# Supplementary material for: A novel technique for the formation of embryoid bodies inside liquid marbles
Source: Royal Society of Chemistry journal article supplement (doi:10.1039/c3ra40364e), 2013-01-01
Supplement: c3ra40364e.pdf [file c3ra40364e.pdf]

Supporting information 1. An embryonic body formed inside liquid marble and differentiated into beating cardiovascular cells on day 10 of the experiment.
